# Supplementary material for: Investigating the interactions between wakes and floating wind turbines using FAST.Farm
Source: Copernicus journal article supplement (doi:10.5194/wes-2024-40), 2024-04-08
Supplement: Supplementary file [file wes-2024-40-RC2-supplement.pdf]

## General Comments/Summary

This manuscript provides a comprehensive analysis for studying wake effects for floating wind turbines in FAST.Farm. The authors begin their study by simulating a single turbine case validating FAST.Farm with an LES Study (Johlas et al. 2020). Importantly, they find merit in using the newly implemented curled wake model as it outperforms the standard polar wake model, especially when it comes to the vertical wake deflection. Secondly, the authors analyze power, tower base loads, and blade loading for a three turbine array in a comprehensive range of environmental conditions. Additionally, they compare their results with fixed turbines as a reference, which provides a helpful baseline. They find that their results largely depend on a balance between the mean pitch angle, the floater motions, and the vertical wake deflection, which depend on the environmental conditions. Their structural analysis is comprehensive by analyzing damage equivalent loading and power spectral densities. Additionally, the authors do a good job of stating the limitations of their work/model, which is appreciated. Overall, this is great work that can be improved with a few minor revisions as suggested below.

## Specific suggestions and questions

- Starting in line 13: I do not think the word compliance is being used correctly throughout the manuscript and I have not seen it used in this manner in the literature. Typically, compliance is used with respect to a standard or specific criteria, which is not the case in this study. I believe the authors can simply reference to the “impact of the floating substructure”, “impact of a floating turbine compared to fixed” or the “impact of the motions of the floating substructure”. Please double-check the use of the word “compliance” throughout the manuscript.
- Line 15: The power and loading of the array are indeed affected by the waves, change in tower frequency, and vertical deflection of the wake. It may seem obvious, but the velocity deficit itself because of the wake has a primary effect that should be stated where appropriate. While the vertical wake deflection is important, ultimately the magnitude of how much the pitch changes for downwind turbines depends on the strength of the wake or velocity deficit (which your results show).
- Section 3.2 and 3.3: Why is  $C_{meander}$  changed for the Curled wake model? Please state if this is to be consistent with the polar model. From Fig. 7, it seems that the  $C_{meander}$  has a negligible effect on the wake dynamics for the curled wake model. Additionally, in line 328, please explicitly state that swirl is used (I’m assuming).
- Line 334 and Fig. 9: This figure is only briefly discussed; however, I believe it is important to your work. I suggest moving the sentence beginning on line 334 and starting a new paragraph at the end of Section 3.2. I recommend including a sentence or two describing the “good” agreement. For example, you could mention the transition from the bimodal distribution in the near wake to a more gaussian distribution further downwind is well-captured and so on.
- Line 387 and throughout: Please double-check your use of the word “oscillation”, which is used a lot. Oscillation describes repetitive motion usually at a specific frequency. Other words that might be a better choice are: variability, fluctuation, energy, motion (depending on the sentence).

- Line 417: The fact that the tower-base DELs increase for fixed and not floating is quite striking. I would at least say here that it has to do with the difference in the tower frequencies and then state that you show/expand on this later. It takes a while to get to when this is finally stated.
- Section 4.3: I would move this subsection to the appendix. The discussion on blade loading is much smaller compared to the tower-base loading. There is really no difference in the results here, but it is nice to see that. In line 502, what are the cases where there are large relative differences in the standard deviation? I don't see this in Fig. 20. I also think line 508 does not need to be a separate paragraph.

### **Minor suggestions**

- Line 11: please state the separation distance for the three-unit array in the abstract.
- Line 15: remove "in a nutshell"
- Line 20: I think a more upbeat word than interesting could get readers excited about this work
- Line 24: how about Hywind Tampen?
- Line 49: remove "a"
- Line 71: What are the limitations of previous implementations? Please state one or two.
- Line 134: I don't think you can technically say "floating boundary condition". It's a fixed boundary condition attached to a floating substructure. Suggest rewording
- Line 148: state what the  $z_0$  used was
- Line 214: a little odd to have a single sentence paragraph. I think you can move this sentence to the end of the first paragraph in this subsection.
- Line 277: need a period after Fig
- Line 281: no comma needed after velocity
- Line 301: parentheses for citation are incorrect
- Line 337: remove "in a nutshell"
- Line 336: please state the cases
- Line 455: A rough estimate of the "wide" range in Hz would be helpful here
- Line 461: remove besides
- Line 472: what is "this" frequency range? Please state it
- Line 556: add the hyphen between above rated. Double check that you are consistent for below-rated, at-rated, and above-rated.
